# Supplementary material
Source: PubMed Central journal article supplement (PMC3070982)
Supplement: jcbfm2010227x1.pdf [file jcbfm2010227x1.pdf]

**Supplementary Information: Yaseen et al, “Microvascular oxygen tension and flow measurements in rodent cerebral cortex during baseline conditions and functional activation,” JCBFM**

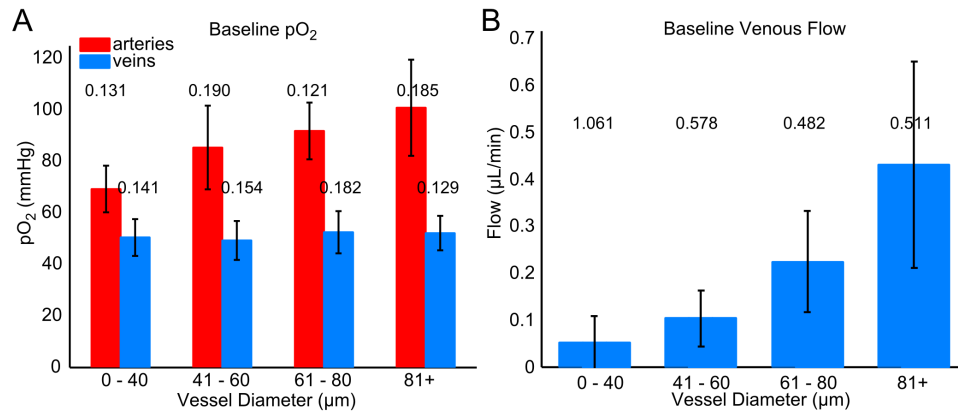

**Supplementary Figure 1:** (a) Baseline pO<sub>2</sub> in arteries and veins, grouped by vessel diameter, with corresponding coefficients of variation (CV) reported (b) Baseline flow in ascending venules, grouped by vessel diameter, with corresponding coefficients of variation

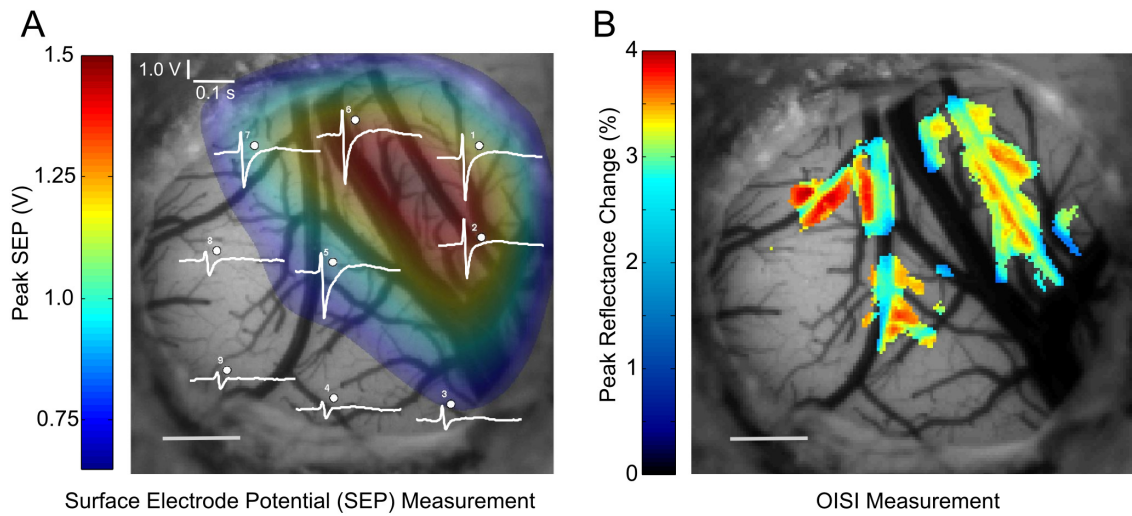

**Supplementary Figure 2:** (a) Stimulation-induced electrical activity map in rat somatosensory cortex. White circles represent locations at which surface electrode potentials (SEP) were recorded. Traces of block-averaged SEPs are provided for each recording location. (b) corresponding stimulation-induced hemodynamic activity map, collected with OISI Scale bars: 500  $\mu\text{m}$ .

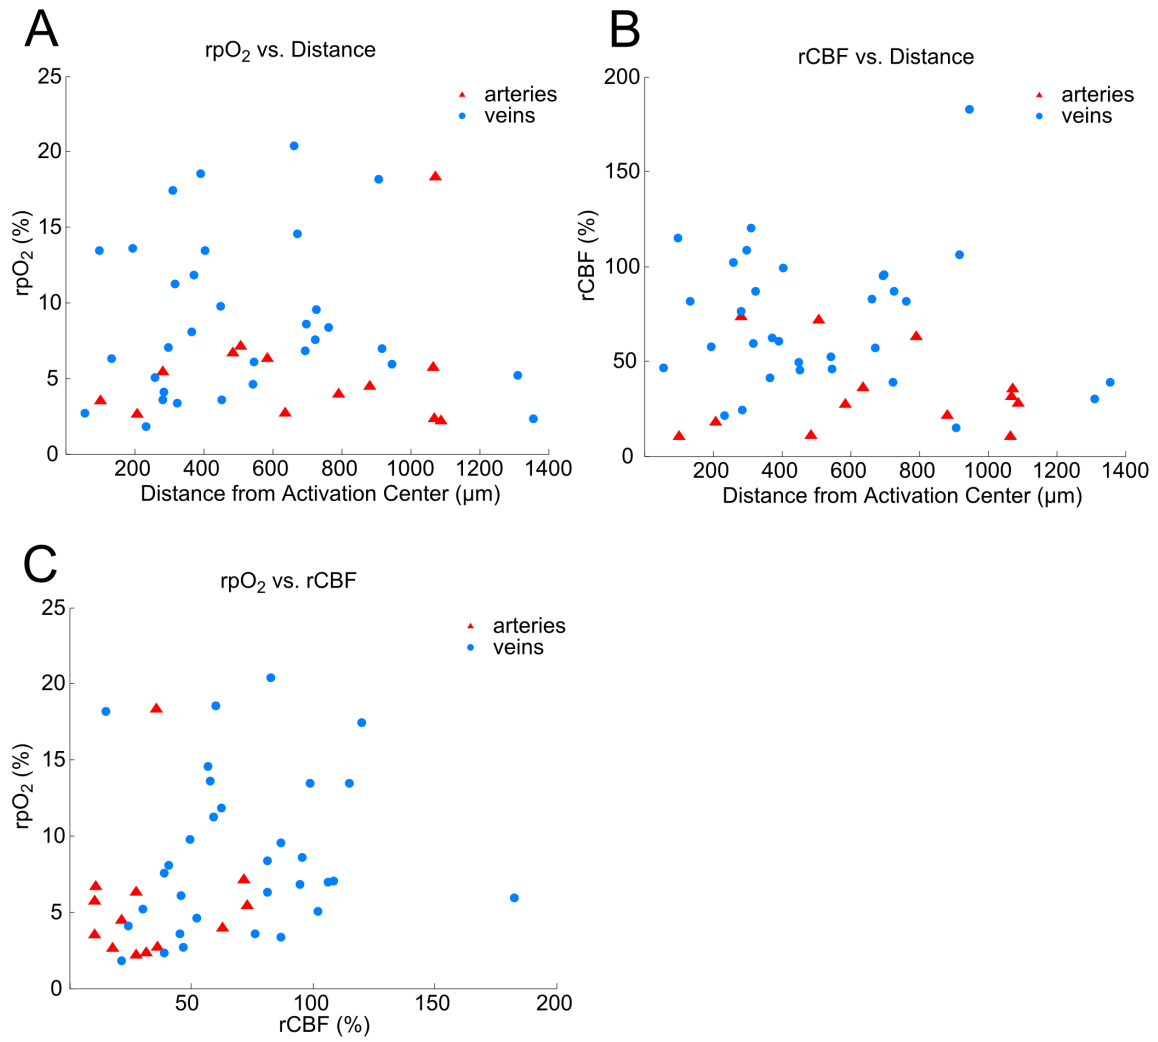

**Supplementary Figure 3.** a) Peak  $rpO_2$  versus corresponding vessel distance from activation center in response to somatosensory activation b) Peak rCBF versus corresponding vessel distance from activation center in response to somatosensory activation c) Peak  $rpO_2$  versus corresponding peak rCBF in arterioles (red triangles) and venules (blue circles) in response to somatosensory activation

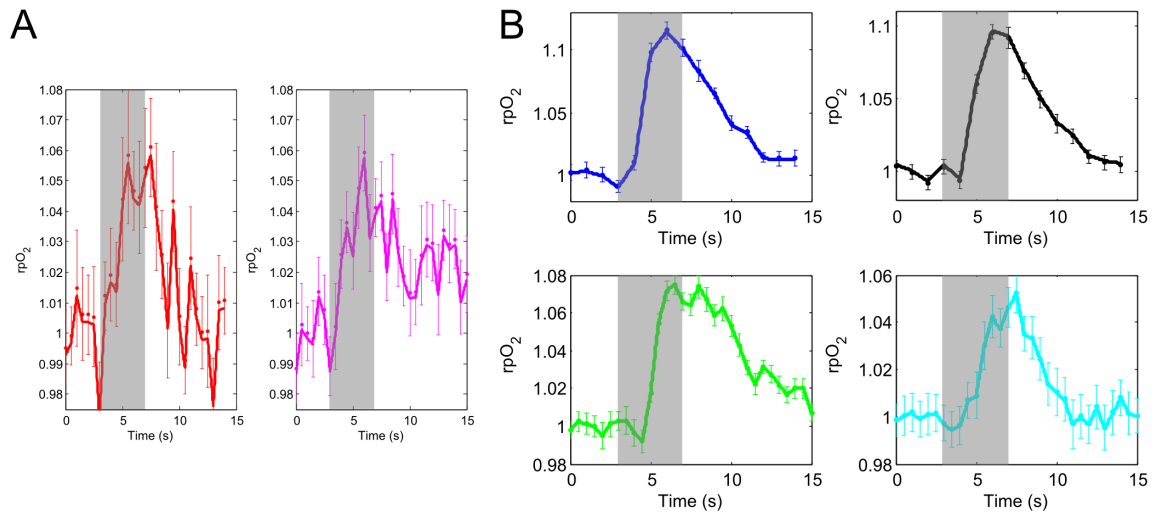

**Supplementary Figure 4.** Select rpO<sub>2</sub> profiles in cortical (a) arterioles and (b) venules presumably showing the elusive “initial dip” upon the onset of functional stimulation. The shaded region depicts the time during which a 4-second stimulus train of 300  $\mu$ s, ~2 mA electrical pulses was delivered to the forepaw at 3 Hz. The small amplitude, measurement variability, and temporal resolution prevent conclusive identification of the initial dip.
